# Supplementary material for: Correlates of and Body Composition Measures Associated with Metabolically Healthy Obesity Phenotype in Hispanic/Latino Women and Men: The Hispanic Community Health Study/Study of Latinos (HCHS/SOL)
Source: Hindawi journal article supplement (doi:10.1155/2019/1251456), 2019-01-15
Supplement: f1 [file 1251456.f1.pdf]

Supplementary Table 1: Associations between behavioral characteristics and metabolically healthy obesity phenotype among Hispanic/Latino women and men with obesity— Prevalence Ratios (PRs) and 95% CIs.

| Behavioral Characteristics             | SD         | Women<br><i>n</i> = 3552 | Men<br><i>n</i> = 1874 |
|----------------------------------------|------------|--------------------------|------------------------|
|                                        |            | PR (95% CI)              | PR (95% CI)            |
| Lifetime Cigarette Use (pack/yrs)      | 12.8       |                          | 11.6                   |
| Model 1                                |            | 0.82 (0.65, 1.02)        | 1.06 (0.85, 1.31)      |
| Model 2                                |            | 0.84 (0.67, 1.05)        | 1.08 (0.89, 1.31)      |
| Weekly Alcohol Consumption (g)         | 4.0        |                          | 7.2                    |
| Model 1                                |            | 1.09 (1.03, 1.15)**      | 0.81 (0.66, 1.01)      |
| Model 2                                |            | 1.09 (1.02, 1.17)*       | 0.82 (0.68, 1.00)      |
| Model 3: Model 2 + Body Fat %          |            | 1.08 (1.02, 1.15)**      | 0.90 (0.81, 1.00)      |
| Model 4: Model 2 + Waist Circumference |            | 1.17 (1.12, 1.22)**      | 0.90 (0.81, 1.00)      |
| Model 5: Model 2 + Body Lean Mass      |            | 1.07 (1.01, 1.14)*       | 0.90 (0.81, 1.00)      |
| Diet quality (AHEI-2010)               | 7.9        |                          | 6.6                    |
| Model 1                                |            | 1.07 (0.92, 1.24)        | 1.05 (0.87, 1.26)      |
| Model 2                                |            | 1.02 (0.84, 1.25)        | 1.20 (0.93, 1.55)      |
| Weekly PA Levels                       | <i>n/a</i> |                          | <i>n/a</i>             |
| Model 1                                |            |                          |                        |
| Inactive/Low                           |            | Ref.                     | Ref.                   |
| Medium/High                            |            | -0.03 (-0.29, 0.23)      | 0.26 (-0.21, 0.74)     |
| Model 2                                |            |                          |                        |
| Inactive/Low                           |            | Ref.                     | Ref.                   |
| Medium/High                            |            | -0.02 (-0.27, 0.23)      | 0.28 (-0.20, 0.77)     |

Note: At-risk obese phenotype is the referent group. Standard deviation is weighted and shown for ease of interpretation of results.

Abbreviations: SD = Standard Deviation; NA = Does not apply.

Model 1: Adjusted for age (years).

Model 2: Adjusted for variables in model 1 plus Hispanic/Latino background, education, nativity, language preference, field center, and other behavioral characteristics.

\**p*<0.05; \*\**p*<0.01; \*\*\**p*<0.001
